# Supplementary material
Source: publisher figshare collection journal article supplement (https://acs.figshare.com/ndownloader/files/4569403)
Supplement: Supplementary file 1 [file 4569403]

## Supporting information.

### **Simultaneous Determination of Superoxide and Hydrogen Peroxide in Macrophage RAW 264.7 Cell Extracts by Microchip Electrophoresis with Laser-Induced Fluorescence Detection**

Hongmin Li, Qingling Li, Xu Wang, Kehua Xu, Zhenzhen Chen, Xiaocong Gong,  
Xin Liu, Lili Tong, Bo Tang\*

College of Chemistry, Chemical Engineering and Materials Science, Engineering  
Research Center of Pesticide and Medicine Intermediate Clean Production, Ministry  
of Education, Key Laboratory of Molecular and Nano Probes, Ministry of Education,  
Shandong Normal University, Jinan 250014, P. R. China

Correspondence: Professor Bo Tang

Postal address: College of Chemistry, Shandong Normal University

Fax: 86-531-86180017

E-mail: tangb@sdu.edu.cn

#### **The synthesis and characterization of FS.**

A mixture of dichlorofluorescein (1.2 g) and *p*-methylbenzenesulfonyl chloride (1.9 g, 10 mmol) in pyridine (5.0 mL) was stirred at room temperature overnight. Upon concentration to dryness, the residue was taken into ethyl acetate and washed with 1M HCl (2 × 50 mL), water (2 × 50 mL) and brine (2 × 50 mL). The organic layer was dried over anhydrous Na<sub>2</sub>SO<sub>4</sub>, and concentrated *in vacuo* to give crude produce. Purification by flash column chromatography (silica gel, 2:1 hexane / ethyl acetate) furnished FS as a white powder (1.56 g, 78% yield). mp 165-167°C. <sup>1</sup>HNMR (DMSO-d<sub>6</sub>, 300 MHz): δ8.05 (d, <sup>3</sup>J<sub>H,H</sub> = 7.1 Hz, 1H), 7.82 (d, <sup>3</sup>J<sub>H,H</sub> = 8.2 Hz, 4H), 7.73-7.74 (m, 2H), 7.50 (d, <sup>3</sup>J<sub>H,H</sub> = 8.20 Hz, 4H), 7.17 (m, 1H), 7.04 (d, J<sub>H,H</sub> = 2.1Hz, 2H), 6.95 (d, J<sub>H,H</sub> = 2.1Hz, 2H), 2.43 (s, 6H). FTIR (KBr): ν = 1775 (CO, s) cm<sup>-1</sup>.

Elemental analysis (%) calcd. for  $C_{34}H_{22}Cl_2O_9S_2$ : C 57.59, H 3.10, S 9.03; found: C 57.55, H 3.12, S 9.06.
